# Supplementary material for: Diffusion imaging in Huntington’s disease: comprehensive review
Source: PubMed Central journal article supplement (PMC7803908; doi:10.1136/jnnp-2020-324377), 2020-10-08
Supplement: jnnp-2020-324377supp001.pdf [file jnnp-2020-324377supp001.pdf]

Table S1 – ROI and whole-brain cross-sectional studies\*

| Author    | Year | Participants |              |              | ROI analysis                          |                                     |     |     | Whole-brain analysis                                                                       |                                 |     |     | Threshold |                                                                                                                        |
|-----------|------|--------------|--------------|--------------|---------------------------------------|-------------------------------------|-----|-----|--------------------------------------------------------------------------------------------|---------------------------------|-----|-----|-----------|------------------------------------------------------------------------------------------------------------------------|
|           |      | Controls     | PreHD        | HD           | FA                                    | MD                                  | AD  | RD  | FA                                                                                         | MD                              | AD  | RD  |           |                                                                                                                        |
| Mascalchi | 2004 | 21           | 2            | 19           | N/A                                   | HDGC: ↑ in BG, deep WM and whole WM | N/A | N/A | N/A                                                                                        | N/A                             | N/A | N/A | N/A       | p<0.05                                                                                                                 |
| Reading   | 2005 | 7            | 7            | Not included | N/A                                   | N/A                                 | N/A | N/A | PreHD: ↓ in the superior frontal, post-central and pre-central WM                          | N/A                             | N/A | N/A | N/A       | p<0.005 uncorrected, k>50 voxels                                                                                       |
| Rosas     | 2006 | 29           | 15           | 17           | PreHD and HD: ↓ in CC and ↑ IC and BG | N/A                                 | N/A | N/A | PreHD and HD: ↑ in BG ↓ in CC, EC, cerebral peduncles, brainstem, thalamus, subcortical WM | PreHD and HD: ↑ in BG           | N/A | N/A | N/A       | p<0.05                                                                                                                 |
| Kloppel   | 2008 | 20           | 25           | Not included | N/A                                   | PreHD: ↓ in BG                      | N/A | N/A | N/A                                                                                        | N/A                             | N/A | N/A | N/A       | p<0.001                                                                                                                |
| Douaud    | 2009 | 10           | Not included | 14           | HD: ↑ in BG                           | HD: ↑ in BG                         | N/A | N/A | HD: ↑ in BG                                                                                | HD: ↑ in BG, CR, subcortical WM | N/A | N/A | N/A       | <u>WHOLE-BRAIN</u><br>p<0.01 FDR corrected for the MD maps<br>p<0.05 FDR corrected for FA maps<br><u>ROI</u><br>p<0.05 |
| Mandelli  | 2009 | 25           | 15           | 9            | N/A                                   | HD: ↑ in BG<br>PreHD: ↓ in BG       | N/A | N/A | N/A                                                                                        | N/A                             | N/A | N/A | N/A       | p<0.05                                                                                                                 |

|                   |      |    |              |              |                                 |                                                   |                          |                                                 |                                                                          |                                        |                                      |                               |                                                                             |
|-------------------|------|----|--------------|--------------|---------------------------------|---------------------------------------------------|--------------------------|-------------------------------------------------|--------------------------------------------------------------------------|----------------------------------------|--------------------------------------|-------------------------------|-----------------------------------------------------------------------------|
| <b>Della Nave</b> | 2010 | 15 | 1            | 14           | N/A                             | N/A                                               | N/A                      | N/A                                             | HDGC: ↓ in CC, fornix, EC, IFOF, ILF and ↑ in supralenticular frontal WM | HDGC: ↑ areas with ↓ FA plus AF and CP | HDGC: ↑ in areas with ↓ FA           | HDGC: Similar to MD           | p<0.05 TFCE corrected                                                       |
| <b>Sritharan</b>  | 2010 | 17 | Not included | 18           | N/A                             | HD: ↑ in BG, thalamus and CC                      | N/A                      | N/A                                             | N/A                                                                      | N/A                                    | N/A                                  | N/A                           | p<0.005 Bonferroni corrected                                                |
| <b>Stoffers</b>   | 2010 | 25 | 39           | Not included | N/A                             | N/A                                               | N/A                      | N/A                                             | PreHD: ↓ widespread                                                      | PreHD: ↑ widespread                    | PreHD: ↑ thalamic radiations, IC, ED | PreHD: ↑ widespread           | p<0.05                                                                      |
| <b>Rosas</b>      | 2010 | 40 | 19           | 21           | PreHD and HD: ↓ in CC           | N/A                                               | PreHD and HD: ↑ in CC    | PreHD and HD: ↑ in CC                           | N/A                                                                      | N/A                                    | N/A                                  | N/A                           | p<0.05 Bonferroni-corrected                                                 |
| <b>Bohanna</b>    | 2011 | 17 | Not included | 10           | HD: ↓ CC, fornix, EC, CR and SS | HD: ↑ same as ↓ FA plus IC and cerebral peduncles | HD: ↑ CR, IC, EC, fornix | HD: ↑ CC, fornix, EC, IC, CR, SS, cingulum, SLF | N/A                                                                      | N/A                                    | N/A                                  | N/A                           | p<0.05 corrected for multiple comparisons cluster forming threshold of t>3. |
| <b>Di Paola</b>   | 2012 | 34 | 17           | 17           | N/A                             | N/A                                               | N/A                      | N/A                                             | PreHD: ↓ in CC<br>HD: ↓ in CC                                            | N/A                                    | PreHD: No differences<br>HD: ↑ in CC | PreHD: ↑ in CC<br>HD: ↑ in CC | p<0.05 TFCE corrected                                                       |
| <b>Hobbs</b>      | 2013 | 40 | Not included | 61           | HD: No differences              | HD: ↑ in BG                                       | HD: ↑ in BG              | HD: ↑ in BG                                     | HD: ↑ in BG in HD ↓ in WM                                                | HD: ↑ widespread                       | HD: ↑ widespread                     | HD: ↑ widespread              | <u>WHOLE-BRAIN ROI</u><br>p<0.001<br>p<0.05                                 |
| <b>Delmaire</b>   | 2013 | 24 | Not included | 27           | N/A                             | N/A                                               | N/A                      | N/A                                             | HD: ↑ in BG and ↓ in frontal lobe, CR                                    | HD: ↑ widespread                       | N/A                                  | N/A                           | p<0.05 FWE corrected                                                        |

|                             |      |    |              |              |                                                                 |                                       |                                          |                                                           |                                                                  |                                                                                 |                                                                                    |                                                                                 |                              |
|-----------------------------|------|----|--------------|--------------|-----------------------------------------------------------------|---------------------------------------|------------------------------------------|-----------------------------------------------------------|------------------------------------------------------------------|---------------------------------------------------------------------------------|------------------------------------------------------------------------------------|---------------------------------------------------------------------------------|------------------------------|
| <b>Georgiou-Karistianis</b> | 2013 | 36 | 35           | 36           | PreHD and HD: ↑ in BG                                           | PreHD and HD: ↑ in BG                 | N/A                                      | N/A                                                       | N/A                                                              | N/A                                                                             | N/A                                                                                | N/A                                                                             | p<0.05                       |
| <b>Sanchez-Castaneda</b>    | 2013 | 30 | 17           | 12           | PreHD: ↑ in BG<br>HD: ↑ in BG and ↓ in thalamus and hippocampus | PreHD and HD: ↑ MD in BG, hippocampus | N/A                                      | N/A                                                       | N/A                                                              | N/A                                                                             | N/A                                                                                | N/A                                                                             | p<0.05 Bonferroni corrected  |
| <b>Matsui</b>               | 2014 | 34 | 53           | Not included | PreHD: No differences                                           | PreHD: No differences                 | PreHD: No differences                    | PreHD: ↑ orbitofrontal and a inferior frontal lobe region | N/A                                                              | N/A                                                                             | N/A                                                                                | N/A                                                                             | p<0.05 FDR corrected         |
| <b>Novak</b>                | 2014 | 21 | 17           | 19           | N/A                                                             | N/A                                   | N/A                                      | N/A                                                       | HDGC: ↓ CC, SLF, ILF, IC, EC, cingulum                           | HDGC: ↑ CC, ILF, SLF, IC, EC, cingulum, AF and CP                               | N/A                                                                                | N/A                                                                             | p<0.05 FWE corrected         |
| <b>Phillips</b>             | 2014 | 50 | 25           | 25           | PreHD: No differences<br>HD: ↓ in deep WM                       | N/A                                   | PreHD: ↑ in deep WM<br>HD: ↑↑ in deep WM | PreHD: ↑ in deep WM<br>HD: ↑↑ in deep WM                  | N/A                                                              | N/A                                                                             | N/A                                                                                | N/A                                                                             | p<0.05 FDR corrected         |
| <b>Odish</b>                | 2014 | 24 | 22           | 10           | N/A                                                             | N/A                                   | N/A                                      | N/A                                                       | PreHD: No differences total WM<br>HD: No differences in total WM | PreHD: No differences in total GM or total WM<br>HD: ↑ in total GM and total WM | PreHD: ↑ in total WM, no differences in total GM<br>HD: ↑ in total GM and total WM | PreHD: No differences in total GM or total WM<br>HD: ↑ in total GM and total WM | p≤0.001 Bonferroni corrected |
| <b>Rees</b>                 | 2014 | 12 | Not included | 22           | HD: ↓ in cerebellar GM                                          | HD: ↑ in cerebellar GM and WM         | HD: ↑ in cerebellar GM and WM            | HD: ↑ in cerebellar GM and WM                             | N/A                                                              | N/A                                                                             | N/A                                                                                | N/A                                                                             | p<0.05                       |

|                   |      |    |              |              |                           |                                            |                                       |                                               |                                                                        |                                      |                           |                           |                       |
|-------------------|------|----|--------------|--------------|---------------------------|--------------------------------------------|---------------------------------------|-----------------------------------------------|------------------------------------------------------------------------|--------------------------------------|---------------------------|---------------------------|-----------------------|
| <b>Gregory</b>    | 2015 | 36 | Not included | 48           | HD: ↓ in CC and brainstem | N/A                                        | HD: ↑ in CC, CR, EC, IC, PTR, SLF, SS | HD: ↑ in CC, CR, EC, IC, SLF, brainstem       | N/A                                                                    | N/A                                  | N/A                       | N/A                       | p<0.05 FDR corrected  |
| <b>Syka</b>       | 2015 | 14 | Not included | 14           | HD: No differences        | HD: No differences                         | N/A                                   | N/A                                           | N/A                                                                    | N/A                                  | N/A                       | N/A                       | p<0.05 FDR corrected  |
| <b>Faria</b>      | 2016 | 79 | 194          | Not included | PreHD: No differences     | PreHD: ↑ in deep WM, corticostriatal tract | PreHD: ↑ in deep WM                   | PreHD: ↑ in deep WM and corticostriatal tract | PreHD: No differences                                                  | PreHD: ↑ in PTR, CC and occipital WM | Same as MD                | Same as MD                | p<0.05 FWE corrected  |
| <b>Harrington</b> | 2016 | 67 | 37           | Not included | PreHD: ↓ in all tracts    | PreHD: ↑ in all tracts                     | PreHD: ↑ in all tracts                | PreHD: ↑ in all tracts                        | N/A                                                                    | N/A                                  | N/A                       | N/A                       | p<0.05 FDR corrected  |
| <b>Muller</b>     | 2016 | 32 | Not included | 34           | N/A                       | N/A                                        | N/A                                   | N/A                                           | HD: ↑ in BG and ↓ in CC, EC, IC and thalamus                           | N/A                                  | HD: ↑ in BG and dorsal WM | HD: ↑ in BG and dorsal WM | p<0.05 FDR corrected  |
| <b>Gorges</b>     | 2017 | 13 | 12           | Not included | N/A                       | N/A                                        | N/A                                   | N/A                                           | PreHD: No differences                                                  | N/A                                  | PreHD: No differences     | PreHD: No differences     | p<0.05 FDR corrected  |
| <b>Saba</b>       | 2017 | 11 | 12           | 11           | N/A                       | N/A                                        | N/A                                   | N/A                                           | PreHD: No differences<br>HD: ↓ in CC, EC, IC, ATR, PTR, SLF, ILF, IFOF | N/A                                  | N/A                       | N/A                       | p<0.05 FWE corrected  |
| <b>Gregory</b>    | 2020 | 20 | 20           | 40           | N/A                       | N/A                                        | N/A                                   | N/A                                           | HDGC: ↓ widespread                                                     | HDGC: ↑ in CC                        | HDGC: ↑ in subcortical WM | HDGC: ↑ in CC             | p<0.05 TFCE corrected |
| <b>Sweidan</b>    | 2020 | 11 | Not included | 13           | N/A                       | N/A                                        | N/A                                   | N/A                                           | HD: ↓ widespread                                                       | HD: ↓ widespread                     | N/A                       | N/A                       | p<0.05 TFCE corrected |

\*Only bilateral differences noted. HDGC used when manifest HD and preHD were grouped together in a single group

AD: Axial diffusivity, AF: Arciform Fibers, ATR: Anterior Thalamic Radiations, CC: Corpus Callosum, CP: Cerebral Peduncles, CR: Corona Radiata, CST: Corticospinal Tract, DTI: Diffusion Tensor Imaging, FA: Fractional Anisotropy, IC: Internal Capsule, EC: External Capsule, HD: Huntington's Disease, HDGC: Huntington's disease gene-carriers, IFOF: Inferior Fronto Occipital Fasciculus, ILF: Inferior Longitudinal Fasciculus, MD: Mean Diffusivity, preHD: Premanifest Huntington's Disease, PTR: Posterior Thalamic Radiations, RD: Radial Diffusivity, SS: Sagittal Stratum, SLF: Superior Longitudinal Fasciculus, SFOF: Superior Fronto Occipital Fasciculus, UNC: uncinata fasciculi.
