# Supplementary material for: Diffusion imaging in Huntington’s disease: comprehensive review
Source: PubMed Central journal article supplement (PMC7803908; doi:10.1136/jnnp-2020-324377), 2020-10-08
Supplement: jnnp-2020-324377supp003.pdf [file jnnp-2020-324377supp003.pdf]

Table S3 – Longitudinal DTI studies

| Author    | Year | Follow-up (months) | Participants |                     |    | ROI analysis                                  |                                               |                       |                | Whole-brain analysis                                             |     |                                                      |                                                                                   | Threshold                                                 |
|-----------|------|--------------------|--------------|---------------------|----|-----------------------------------------------|-----------------------------------------------|-----------------------|----------------|------------------------------------------------------------------|-----|------------------------------------------------------|-----------------------------------------------------------------------------------|-----------------------------------------------------------|
|           |      |                    | Con<br>trols | PreHD               | HD | FA                                            | MD                                            | AD                    | RD             | FA                                                               | MD  | AD                                                   | RD                                                                                |                                                           |
| Weaver    | 2009 | 12                 | 7            | 4                   | 3  | HDGC: ↓<br>in CC                              | N/A                                           | N/A                   | N/A            | HDGC: ↓<br>IC, CC, CR                                            | N/A | HDGC: ↓<br>IC, CC less<br>extensive<br>than FA       | HDGC: No<br>differences                                                           | p<0.05<br>TFCE<br>corrected                               |
| Sritharan | 2010 | 12                 | 17           | Not<br>includ<br>ed | 18 | HD: No<br>differences                         | N/A                                           | N/A                   | N/A            | N/A                                                              | N/A | N/A                                                  | N/A                                                                               | p<0.005<br>Bonferroni<br>corrected                        |
| Dominguez | 2013 | 18                 | 28           | 29                  | 29 | PreHD:<br>No<br>differences<br>HD: ↑ in<br>BG | PreHD:<br>No<br>differences<br>HD: ↑ in<br>BG | N/A                   | N/A            | N/A                                                              | N/A | N/A                                                  | N/A                                                                               | p<0.05<br>corrected<br>for<br>multiple<br>compariso<br>ns |
| Hobbs     | 2015 | 15                 | 40           | Not<br>includ<br>ed | 61 | HD: No<br>differences                         | HD: ↑ in<br>BG                                | HD: ↑ in<br>BG        | HD: ↑ in<br>BG | N/A                                                              | N/A | N/A                                                  | N/A                                                                               | p<0.05<br>uncorrecte<br>d                                 |
| Gregory   | 2015 | 15                 | 36           | Not<br>includ<br>ed | 48 | HD: ↓ in<br>CC, CR, IC                        | N/A                                           | HD: ↑ in<br>CC and IC | HD: ↑ in<br>CC | N/A                                                              | N/A | N/A                                                  | N/A                                                                               | p<0.05 FDR<br>corrected                                   |
| Poudel    | 2015 | 18                 | 27           | 28                  | 25 | N/A                                           | N/A                                           | N/A                   | N/A            | PreHD:<br>No<br>differences<br>HD: ↓ FA<br>in CC and<br>cingulum | N/A | PreHD:<br>No<br>differences<br>HD: No<br>differences | PreHD:<br>No<br>differences<br>HD: ↑ CC,<br>IC, striatal<br>projection<br>s of WM | p<0.05<br>TFCE<br>corrected                               |
| Dominguez | 2016 | 30                 | 36           | 40                  | 36 | PreHD:<br>No<br>differences                   | PreHD:<br>No<br>differences<br>HD: No         | N/A                   | N/A            | N/A                                                              | N/A | N/A                                                  | N/A                                                                               | p<0.05<br>Bonferroni<br>corrected                         |

|            |      |    |    |              |              | HD: ↑ in BG           | differences        |                       |                       |                       |                    |     |     |                                                                     |
|------------|------|----|----|--------------|--------------|-----------------------|--------------------|-----------------------|-----------------------|-----------------------|--------------------|-----|-----|---------------------------------------------------------------------|
| Harrington | 2016 | 24 | 37 | 67           | Not included | PreHD: No differences | PreHD: ↑ in SFOF   | PreHD: No differences | PreHD: No differences | N/A                   | N/A                | N/A | N/A | p<0.05 FDR corrected                                                |
| Sweidan    | 2020 | 7  | 11 | Not included | 13           | HD: ↓ in CC           | HD: No differences | N/A                   | N/A                   | HD: No differences    | HD: No differences | N/A | N/A | p<0.05 TFCE corrected                                               |
| Pflanz     | 2020 | 12 | 19 | Not included | 19           | PreHD: No differences | PreHD: ↑ in BG     | N/A                   | N/A                   | PreHD: No differences |                    | N/A | N/A | ROI: p<0.05 Bonferroni corrected Whole brain: p<0.05 TFCE corrected |

AD: Axial Diffusivity, AF: Arciform Fibers, ATR: Anterior Thalamic Radiations, CC: Corpus Callosum, CP: Cerebral Peduncles, CR: Corona Radiata, CST: CorticoSpinal Tract, DTI: Diffusion Tensor Imaging, FA: Fractional Anisotropy, IC: Internal Capsule, EC: External Capsule, HD: Huntington's disease, HDGC, Huntington's disease gene-carriers, IFOF: Inferior Fronto Occipital Fasciculus, ILF: Inferior Longitudinal Fasciculus, MD: Mean Diffusivity, preHD: Premanifest Huntington's disease, PTR: Posterior Thalamic Radiations, RD: Radial Diffusivity, SS: Sagittal Stratum, SLF: Superior Longitudinal Fasciculus, SFOF: Superior Fronto Occipital Fasciculus, UNC: uncinat fasciculi
